# Supplementary material for: Unravelling the role of Si and Al impurities in Ni/YSZ fuel electrode degradation in solid oxide electrolysis cells
Source: Royal Society of Chemistry journal article supplement (doi:10.1039/d5ta07252b), 2025-01-01
Supplement: d5ta07252b1.pdf [file d5ta07252b1.pdf]

## Supplementary material

### Unraveling the Role of Si and Al Impurities in Ni/YSZ Fuel Electrode Degradation in Solid Oxide Electrolysis Cells

Bowen Li\*,<sup>1</sup>, Anders Bogh Jacobsen<sup>1</sup>, Julian Taubmann<sup>1</sup>, Peter Blennow<sup>2</sup>, Henrik Lund Frandsen<sup>1</sup>, Wolff-Ragnar Kiebach<sup>1</sup>, Ming Chen\*,<sup>1</sup>

<sup>1</sup> Department of Energy Conversion and Storage, Technical University of Denmark, 2800 Kgs. Lyngby, Denmark

<sup>2</sup> Topsoe A/S, Haldor Topsøes Alle 1, 2800 Kgs. Lyngby, Denmark

\* Corresponding authors: Bowen Li ([bowli@dtu.dk](mailto:bowli@dtu.dk)), Ming Chen ([mincc@dtu.dk](mailto:mincc@dtu.dk))

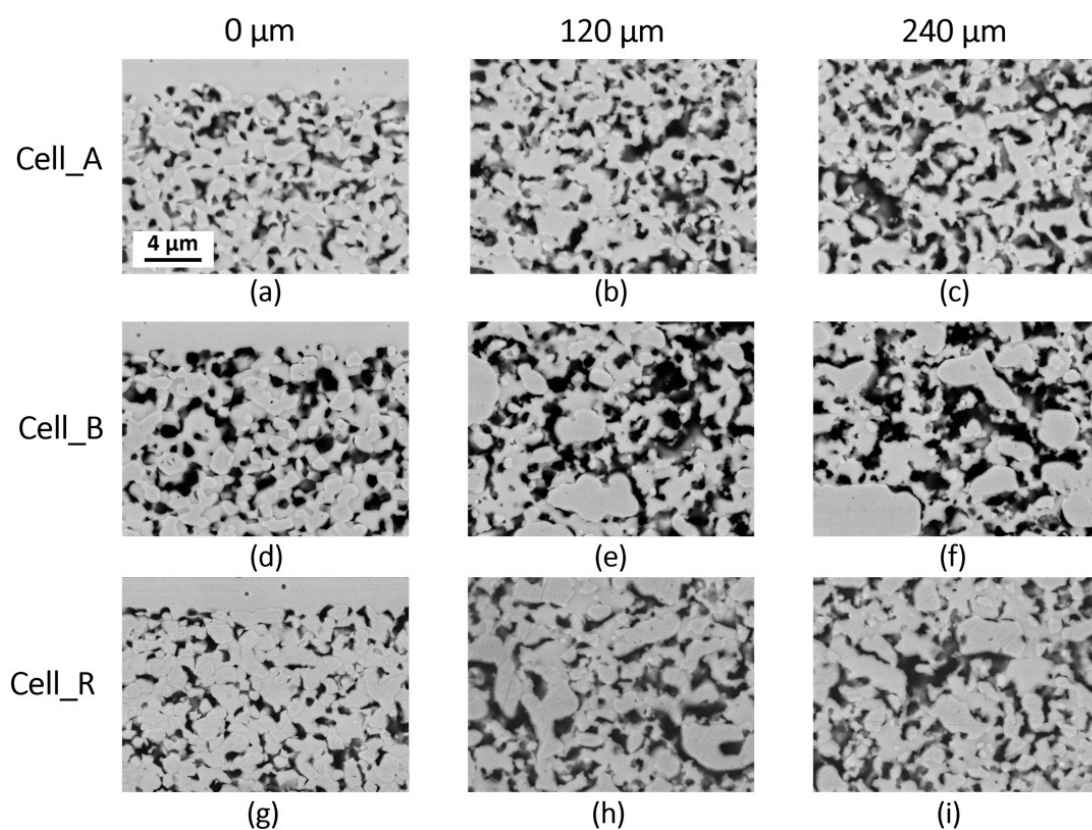

Figure S1. The SEM micrographs of the cross section of (a)-(c) Cell\_A, (d)-(f) Cell\_B and (g)-(i) Cell\_R. All the images were taken at the gas-inlet side of the cells. The locations of the SEM images were recorded at different distance from the electrolyte/electrode interface in fuel electrode: (a, d, g) 0 μm, (b, e, h) 120 μm, and (c, f, i) 240 μm.

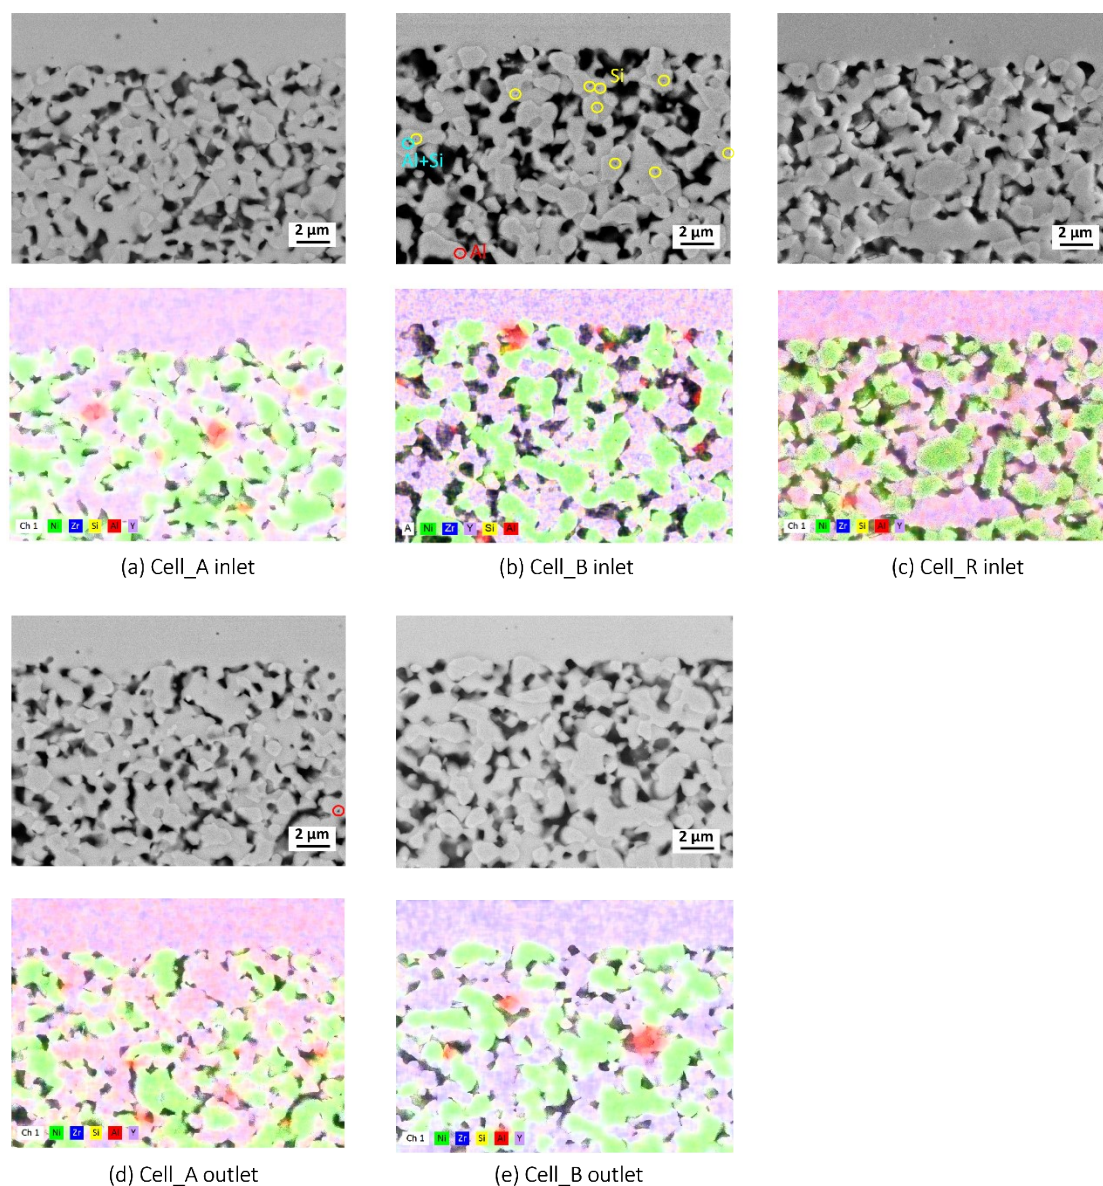

Figure S2. The SEM micrographs, mapping and point analysis of the cross section of Cell\_A, Cell\_B and Cell\_R at gas inlet and outlet. The locations of the SEM images were recorded at the fuel electrode/electrolyte interface.

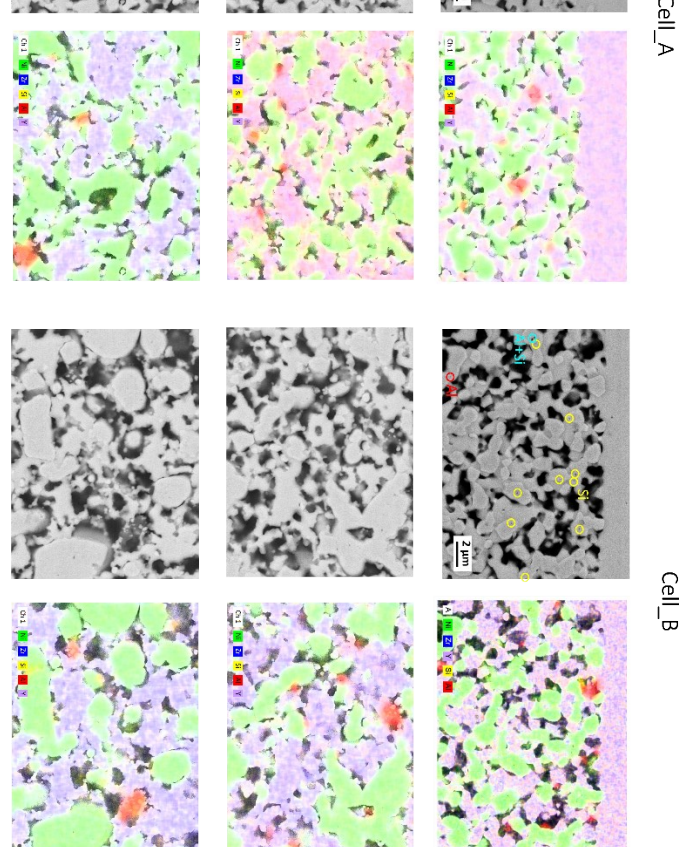

Figure S3. The SEM micrographs, mapping and point analysis of the cross section of Cell\_A, Cell\_B and Cell\_R gas inlet. The locations of the SEM images were recorded at different distance from the electrolyte/electrode interface in fuel electrode: 0  $\mu\text{m}$ , 120  $\mu\text{m}$ , and 240  $\mu\text{m}$ .

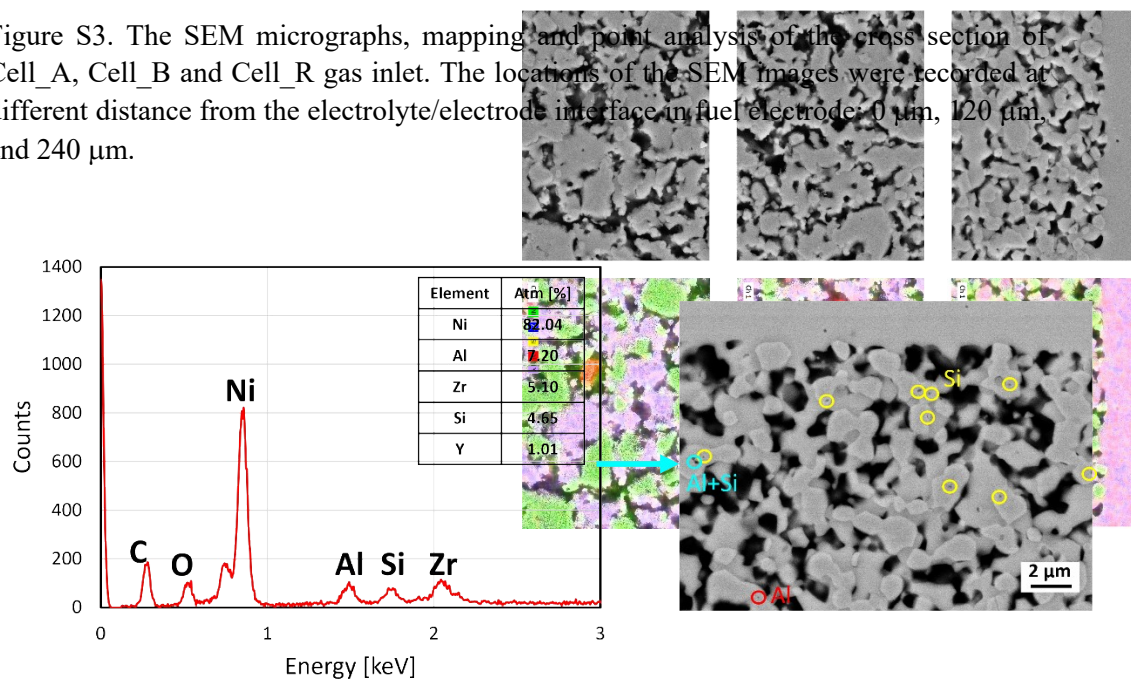

Figure S4. An example of EDX results of point analysis in Cell\_B inlet at electrode/electrolyte interface, and the location is indicated on the SEM image.



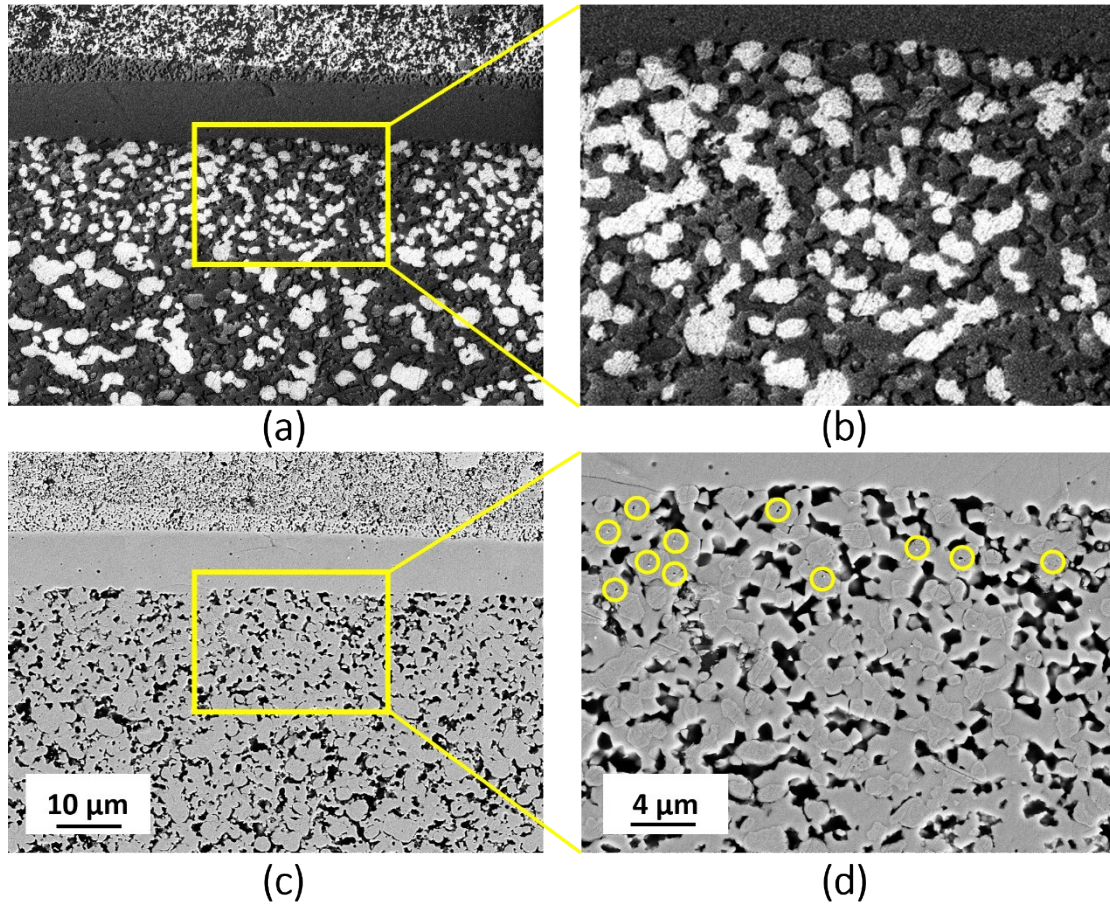

Figure S5. Comparison of percolated Ni images (a–b) and SE2 images (c–d). (b) and (d) are magnified views of (a) and (c), respectively. Yellow circles in (d) indicate locations where Si was detected by EDX analysis.

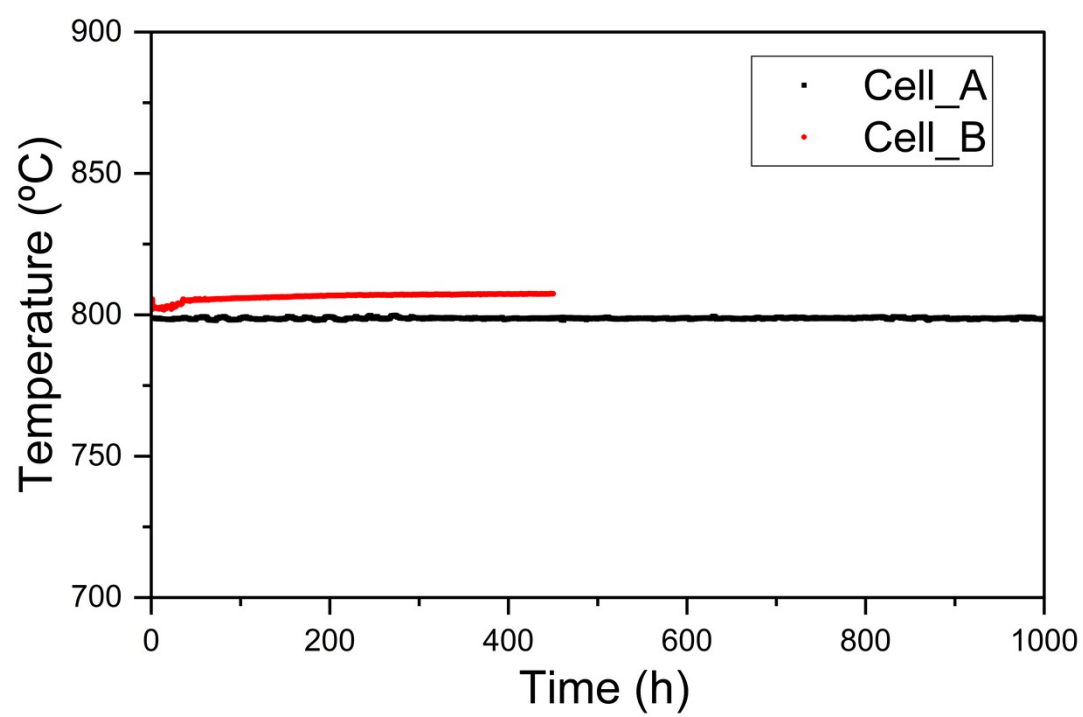

Figure S6. Operation temperature of Cell\_A and Cell\_B throughout the degradation tests.
